# Supplementary material for: Prognostic Value of a Glycolytic Signature and Its Regulation by Y-Box-Binding Protein 1 in Triple-Negative Breast Cancer
Source: MDPI journal article supplement (doi:10.3390/cells10081890), 2021-07-26
Supplement: s1 [file s1]

# Supplementary Material

**Table S1.** List of oligonucleotides for the real-time PCR.

| Gene              | Forward Primer (5' to 3')         | Reverse Primer (5' to 3')       |
|-------------------|-----------------------------------|---------------------------------|
| <i>ENO1</i>       | GCC TCC TGC TCA AAG TCA AC        | AAC GAT GAG ACA CCA TGA CG      |
| <i>SLC2A6</i>     | GGC TGC TCA TGT CTG AGG TC        | GAT GGC CGC GAA GAA GAA GAA     |
| <i>LDHA</i>       | GAT TCC AGT GTG CCT GTA TGG       | CTA CAG AGA GTC CAA TAG CCC     |
| <i>PFKP</i>       | CGC CTA CCT CAA CGT GGT G         | ACC TCC AGA ACG AAG GTC CTC     |
| <i>PGAM1</i>      | CTC CTA TGA TGT CCC ACC           | CTC TGG CAA TAG TAT CCT TC      |
| <i>GPI</i>        | GAA GTG CTG GTC CAT CCA GT        | AAC ATG TTC GAG TTC TGG GA      |
| <i>E-cadherin</i> | GGA ACT ATG AAA AGT GGG CTT G     | AAA TTG CCA GGC TCA ATG AC      |
| <i>Vimentin</i>   | TGT CCA AAT CGA TGT GGA TGT TTC   | TTG TAC CAT TCT TCT GCC TCC TG  |
| <i>Snail</i>      | GCT GCA GGA CTC TAA TCC AGA       | ATC TCC GGA GGT GGG ATG         |
| <i>Slug</i>       | GCA TTT CAA CGC CTC CAA AAA GCC   | AGC AGC GGT AGT CCA CAC AGT GAT |
| <i>Twist</i>      | GGC ATC ACT ATG GAC TTT CTC TAT T | GGC CAG TTT GAT CCC AGT ATT     |
| <i>YBX1</i>       | TAG ACG CTA TCC ACG TCG TAG       | ATC CCT CGT TCT TTT CCC CAC     |
| <i>β-actin</i>    | AAG TCC CTT GCC ATC CTA AAA       | ATG CTA TCA CCT CCC CTG TG      |
